# Supplementary material
Source: Springer Nature journal article supplement (https://www.springermedizin.de/resource/supplementary/13000_2012_686_MOESM4_ESM.pdf/9624872)

# Broadband type

■ optics

■ DSL

■ Cable, etc.

◆ Cost (\$/1Mbps)

【Unit: 0.01 million subscribers】

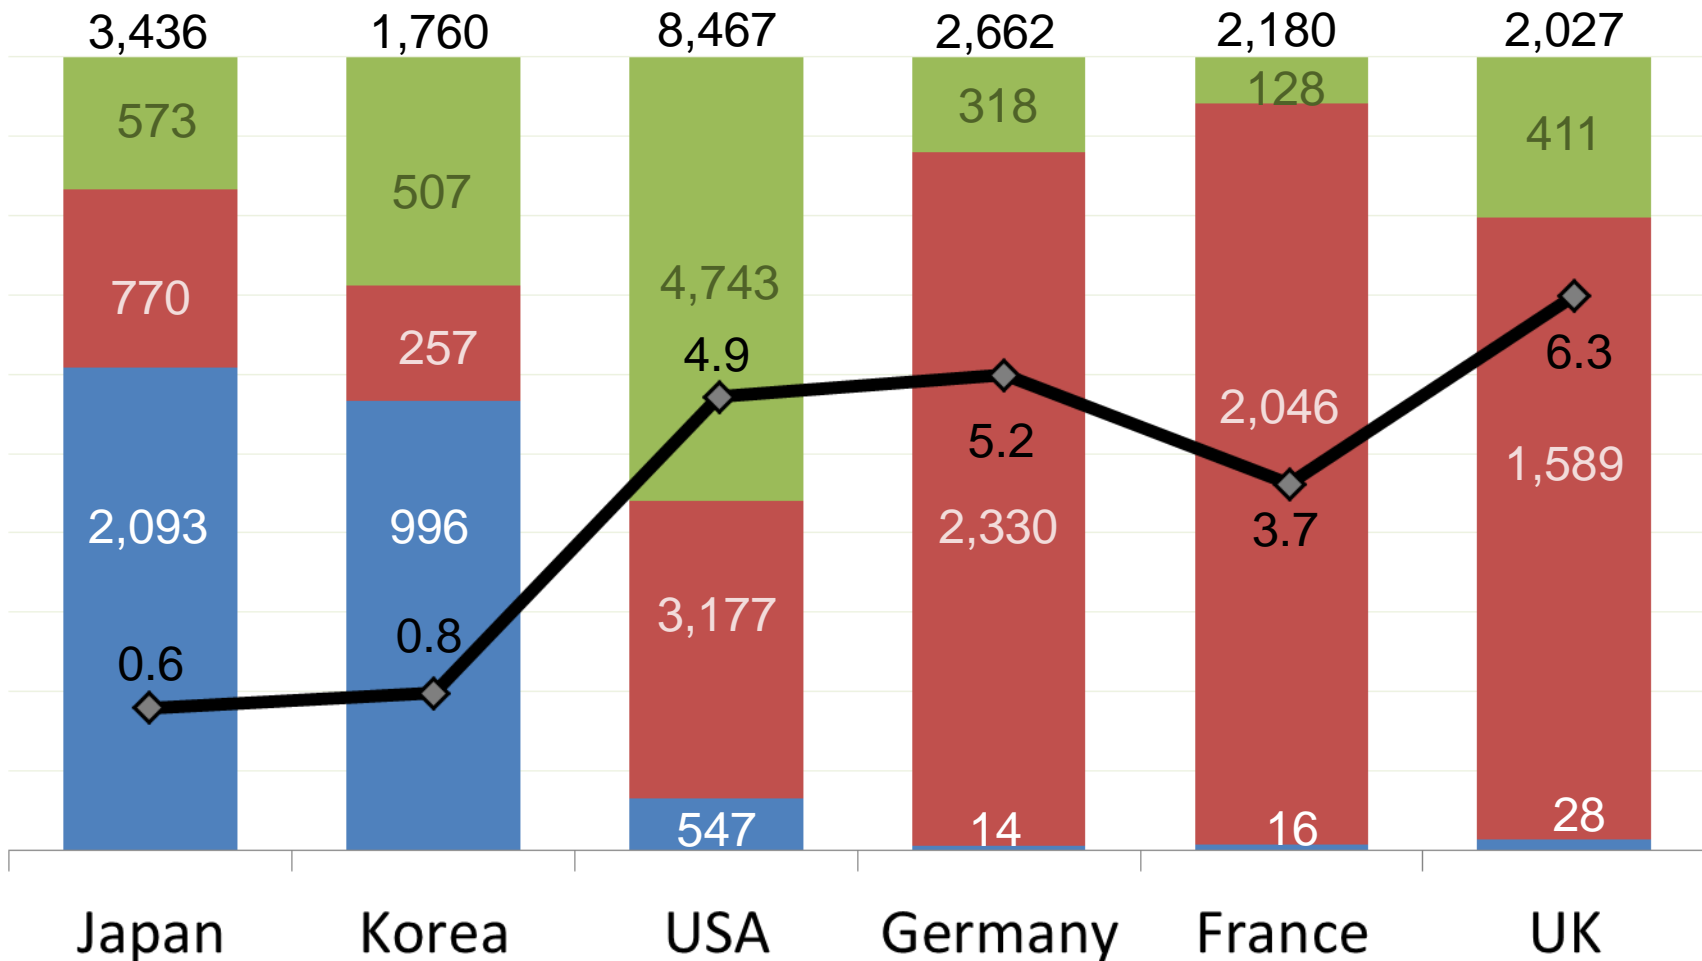

Supplement: MOESM4 [file 9624872]
